# Supplementary material
Source: Research Square preprint supplement (doi:10.21203/rs.3.rs-9040928/v1)
Supplement: Supplementary file 1 [file 502cae2a0e5845d659ffcd6f.docx]

**Appendix A**: Search string

nursing education
"Education, Nursing" OR "Educations, Nursing" OR "Nursing Education" OR "Nursing Educations" OR "Education program" OR "education programs" OR "nursing education program" OR "nursing education programs"
AND
healthcare delivery
"Delivery of Health Care" OR "Deliveries, Healthcare" OR "Delivery of Healthcare" OR "Delivery, Health Care" OR "Delivery, Healthcare"
AND
healthcare providers nurses OR midwives
"Health Personnel" OR "Health Care Professional" OR "Health Care Professionals" OR "Health Care Provider" OR "Health Care Providers" OR "Healthcare Provider" OR "Healthcare Providers" OR "Healthcare Worker" OR "Healthcare Workers" OR "Personnel, Health" OR "Professional, Health Care" OR "Provider, Health Care" OR "Provider, Healthcare" OR "Providers, Health Care" OR "Providers, Healthcare" OR "Nurses" OR "Nurse" OR "Nurse, Registered" OR "Nurses, Registered" OR "Nursing Personnel" OR "Personnel, Nursing" OR "Registered Nurse" OR "Registered Nurses" OR "Birth Attendant, Traditional" OR "Birth Attendants, Traditional" OR "Midwife" OR "Midwives" OR "Traditional Birth Attendant" OR "Traditional Birth Attendants"
AND
low and middle income countries
"Developing Countries" OR "Countries, Developing" OR "Countries, Least Developed" OR "Countries, Less-Developed" OR "Countries, Middle Income" OR "Countries, Third-World" OR "Countries, Under-Developed" OR "Country, Developing" OR "Country, Under-Developed" OR "Developing Country" OR "Developing Nation" OR "Developing Nations" OR "LMICs" OR "LMIC" OR "Least Developed Countries" OR "Least Developed Country" OR "Less Developed Countries" OR "Less Developed Nations" OR "Less-Developed Countries" OR "Less-Developed Country" OR "Less-Developed Nation" OR "Less-Developed Nations" OR "Low Income Countries" OR "Low Income Country" OR "Low and Middle Income Countries" OR "Lower Middle Income Country" OR "Lower-Middle-Income Countries" OR "Lower-Middle-Income Country" OR "Middle Income Countries" OR "Middle Income Country" OR "Nations,Less-Developed" OR "Nations, Third-World" OR "Nations, Under-Developed" OR "Third World Countries" OR "Third World Nations" OR "Third-World Countries" OR "Third-World Country" OR "Third-World Nation" OR "Third-World Nations" OR "Under Developed Countries" OR "Under Developed Nations" OR "Under-Developed Countries" OR "Under-Developed Country" OR "Under-Developed Nations"

**Full search string for PubMed:**
(("education nursing"[All Fields] OR ("education,nursing"[MeSH Terms] OR ("education"[All Fields] AND "nursing"[All Fields]) OR "Nursing Education"[All Fields] OR ("educations"[All Fields] AND "nursing"[All Fields])) OR "Nursing Education"[All Fields] OR "Nursing Educations"[All Fields] OR "Education program"[All Fields] OR "education programs"[All Fields] OR "nursing education program"[All Fields] OR "nursing education programs"[All Fields]) AND ("Delivery of Health Care"[All Fields] OR ("Delivery of Health Care"[MeSH Terms] OR ("delivery"[All Fields] AND "health"[All Fields] AND "care"[All Fields]) OR "Delivery of Health Care"[All Fields] OR ("deliveries"[All Fields] AND "healthcare"[All Fields])) OR "Delivery of Healthcare"[All Fields] OR "delivery health care"[All Fields] OR "delivery healthcare"[All Fields]) AND ("Health Personnel"[All Fields] OR "Health Care Professional"[All Fields] OR "Health Care Professionals"[All Fields] OR "Health Care Provider"[All Fields] OR "Health Care Providers"[All Fields] OR "Healthcare Provider"[All Fields] OR "Healthcare Providers"[All Fields] OR "Healthcare Worker"[All Fields] OR "Healthcare Workers"[All Fields] OR "personnel health"[All Fields] OR "professional health care"[All Fields] OR "provider health care"[All Fields] OR "provider healthcare"[All Fields] OR "providers health care"[All Fields] OR "providers healthcare"[All Fields] OR "Nurses"[All Fields] OR "Nurse"[All Fields] OR "nurse registered"[All Fields] OR "nurses registered"[All Fields] OR "Nursing Personnel"[All Fields] OR "personnel nursing"[All Fields] OR "Registered Nurse"[All Fields] OR "Registered Nurses"[All Fields] OR "birth attendant traditional"[All Fields] OR "birth attendants traditional"[All Fields] OR "Midwife"[All Fields] OR "Midwives"[All Fields] OR "Traditional Birth Attendant"[All Fields] OR "Traditional Birth Attendants"[All Fields]) AND ("Developing Countries"[All Fields] OR "countries developing"[All Fields] OR "countries least developed"[All Fields] OR "countries less developed"[All Fields] OR "countries middle income"[All Fields] OR "countries third world"[All Fields] OR "countries under developed"[All Fields] OR "country developing"[All Fields] OR "country under developed"[All Fields] OR "Developing Country"[All Fields] OR "Developing Nation"[All Fields] OR "Developing Nations"[All Fields] OR "LMICs"[All Fields] OR "LMIC"[AllFields] OR "Least Developed Countries"[All Fields] OR "Least Developed Country"[All Fields] OR "less developed countries"[All Fields] OR "less developed nations"[All Fields] OR "less developed countries"[All Fields] OR "Less-Developed Country"[All Fields] OR "Less-Developed Nation"[All Fields] OR "less developed nations"[All Fields] OR "Low Income Countries"[All Fields] OR "Low Income Country"[All Fields] OR "Low and Middle Income Countries"[All Fields] OR "lower middle income country"[All Fields] OR "Lower-Middle-Income Countries"[All Fields] OR "lower middle income country"[All Fields] OR "Middle Income Countries"[All Fields] OR "Middle Income Country"[All Fields] OR "nations less developed"[All Fields] OR (("ethnicity"[MeSH Terms] OR "ethnicity"[All Fields] OR "nationalities"[All Fields] OR "nationality"[All Fields] OR "federal government"[MeSH Terms] OR ("federal"[All Fields] AND "government"[All Fields]) OR "federal government"[All Fields] OR "national"[All Fields] OR "nation"[All Fields] OR "nation s"[All Fields] OR "nationalism"[All Fields] OR "nationalisms"[All Fields] OR "nationalization"[All Fields] OR "nationalized"[All Fields] OR "nationally"[All Fields] OR "nationals"[All Fields] OR "nations"[All Fields] OR "nations s"[All Fields]) AND "third world"[All Fields]) OR (("ethnicity"[MeSH Terms] OR "ethnicity"[All Fields] OR "nationalities"[All Fields] OR "nationality"[All Fields] OR "federal government"[MeSH Terms] OR ("federal"[All Fields] AND "government"[All Fields]) OR "federal government"[All Fields] OR "national"[All Fields] OR "nation"[All Fields] OR "nation s"[All Fields] OR "nationalism"[All Fields] OR "nationalisms"[All Fields] OR "nationalization"[All Fields] OR "nationalized"[All Fields] OR "nationally"[All Fields] OR "nationals"[All Fields] OR "nations"[All Fields] OR "nations s"[All Fields]) AND "under developed"[All Fields]) OR "third world countries"[All Fields] OR "third world nations"[All Fields] OR "third world countries"[All Fields] OR "Third-World Country"[All Fields] OR "Third-World Nation"[All Fields] OR "third world nations"[All Fields] OR "under developed countries"[All Fields] OR "under developed nations"[All Fields] OR "under developed countries"[All Fields] OR "Under-Developed Country"[All Fields] OR "under developed nations"[All Fields]) AND2015/01/01:2025/12/31[Date - Publication]) AND (2015:2025[pdat])
