# Supplementary material
Source: Research Square preprint supplement (doi:10.21203/rs.3.rs-9040928/v1)
Supplement: Supplementary file 3 [file 6af53efa1e1ee1ebc64dda84.xlsx]

## Sheet: Quantitative data
Ref. Code	Authors/Year	Title	Type of study Quantitative, mixed methods	Aim	Site of the study	Methods RCT, cross sect., Quasi.	Participants (Nurses, Midwife)	Simple size	Multidisciplinarity	Duration of intervention	Intervention	Control (If applicable)	Description of the Intervention	Level 1: Participant Satisfaction or reaction	Level 2: Gained knowledge, improved skills, or changed attitudes	Level 3: Behavior (Application/Transfer to Practice)	Level 4: Results: Impact on Healthcare Outcomes
1	Wang, F., Xiao, L. D., Wang, K., Li, M., & Yang, Y. (2017).	Evaluation of a WeChat-based dementia-specific training program for nurses in primary care settings: A randomized controlled trial	Quantitative	To improve community nurses' knowledge, attitudes, and practice changes using an innovative and interactive mobile phone applet-based activity in primary care settings	China	RCT	Primary care nurses	IG=61 CG=54	No	2-weekly lectures lasting 3 hours each with a face-to-face discussion.	Dementia-specific training program	Training for the care of older people with disability	The authors of this study designed the training program for primary care nurses. A 3-factor education intervention model was applied. The model emphasizes on (1) the use of lectures and written materials to disseminate learning content to learners; (2) developing resources to support learners to implement new skills and (3) reinforcing new skills by providing timely feedback and peer support. Aft…	Participants initially reported high program satisfaction at T2 (2-week post-baseline), with all items rated above 4 on the scale (Theme 1. Participants satisfaction over time). However, global satisfaction significantly decreased by T3 (3-month follow-up, p=0.035) (Subtheme. Significant decline in global satisfaction post-Intervention). Specific items showing significant decreases in satisfactio…	The intervention significantly improved overall knowledge related to Alzheimer's disease. Analysis using the Chinese Alzheimer's Disease Knowledge Scale (CADKS) revealed a significant group-by-time interaction (F=31.35,p<0.001), with the intervention group (IG) demonstrating significantly higher total knowledge scores at both T2 and T3 compared to the control group (CG). (Theme. Improved cognitiv…	The training successfully impacted participants' clinical behaviors related to dementia detection. A large majority of participants (86.1%) regularly encountered clients reporting subjective memory complaints (Theme 1. Changed practice). After the intervention, the intervention group (IG) demonstrated a significantly higher proportion of nurses who reported advising on cognitive screening (p=0.02…	Not assessed
2	Ojji, D., Aifah, A., Iwelunmor, J., Hade, E. M., Onakomaiya, D., Colvin, C., ... & Ekanem, A. (2023).	Building capacity of community nurses to strengthen the management of uncomplicated hypertension in persons living with HIV in low-and middle-income countrie	Quantiative	Evaluating the effectiveness of practice facilitation on the integration of a task-strengthening strategy for hypertension control (TASSH) into primary healthcare centres in Akwa Ibom State of Nigeria	Nigeria	Pre- and post study	nurses	98	No	3 didactic training workshops (June 2021, July 2021, November 2021) of 1–2 days for 6 hours	Training programme	N/A	This study's intervention focused on training Community Nurses (CNs) and Peer Facilitators (PFs) from Primary Healthcare Centers (PHCs) providing HIV services to deliver the TASSH (Task-shifting Strategy for Hypertension Control) program to people living with HIV (PLWH) who have uncontrolled hypertension. The training involved three didactic workshops held in June, July, and November 2021, with e…	Participants in the training expressed high levels of satisfaction. The content's relevance was rated as excellent or very good by 86.1% of participants (13.9% rated it good). Similarly, 85.6% found the training methodology excellent or very good (14.6% rated it good) (Theme 1. Participants satisfaction --ST. Positive affective response to program design and delivery ). While role-play's usefulne…	The training workshops significantly improved participants' knowledge. In the first workshop, mean knowledge scores increased from 11.9(±3.4) to 15.9(±2.9) (p<0.001). Similarly, in the second workshop, scores improved from 15.4(±1.4) to 16.4(±0.9) (p<0.001).(Theme. Sustained improvement in task-strengthening knowledge ---ST. Significant and immediate knowledge acquisition across multiple training…	Not assessed	Not assessed
3	Dinh, T., Khairallah, T., Nguyen, C., Deshpande, G., Krzyzaniak, S., Barton, G., ... & Holterman, A. (2022).	Pass-a course in pediatric acute surgical support to build pediatric surgical emergencies capacity in developing countries.	Quantitative	To prepare caregivers in LMIC for the acute management of life-threatening pediatric surgical emergencies.	Viet Nam	Quasi-Experimental (With pre-posttest)	Nurse	37	Physician (55)	2.5-days sessions at two children hospitals	Pediatric Acute Surgical Support (PASS) course	N/A	The intervention was the Pediatric Acute Surgical Support (PASS) course delivered to caregivers including physicians and nurses from pediatric critical care, surgery, emergency medicine and anesthesiology. It was designed and delivered by a multidisciplinary team of PALS and ATLS physician and nurse instructors in emergency medicine, pediatric critical care, and surgery specialties from the Unite…	The learners’ course assessment revealed that 93.2% of the responses grading the didactic content as appropriate in the level of difficulty with 4.5% aid being too easy and 2.3% as being too difficult (Theme 1. Participants satisfaction. ST. Positive affective response to content appropriateness and instructor fidelity). All the learners agreed the practical applicability of the didactic content;…	The course increased the nurses’ course score from 46.8+/- 15.3% before to 67.3% +/- 12.9% after the course (p> 0.001) (Theme1. Improved cognitive knowledge acquisition. ---ST. Significant and immediate knowledge acquisition). Even though that course score between nurses and physicians was different before the course (p> 0.001), it became narrow after the course (p = 0.04), revealing an larger in…	Not assessed	Not assessed
4	Goyal, M., & Chaudhry, D. (2019).	Impact of educational and training programs on knowledge of healthcare students regarding nosocomial infections, standard precautions and hand hygiene: a study at tertiary care hospital.	Quantitative	To access the existing knowledge among HCSs and determine the impact of educational and training programs regarding nosocomial infections, standard precautions, and hand hygiene.	India	Quasi-Experimental (With pre-posttest)	Nurse	217	Physician (511)	30min	Educational and training programs	N/A	The intervention consisted of an educational and training program delivered to healthcare students (medical, dental, and nursing) focused on nosocomial infections, standard precautions, and hand hygiene. The format was a brief lecture cum workshop conducted in small batches. The educational component included a 30-minute didactic session covering key concepts and guidelines from the CDC and WHO s…	Not assessed	The findings revealed that the educational and training programs improved the HCSs´ knowledge as their mean knowldege scores significantly increased from 37.30 (4.81) in pretest to 42.03 (4.55) in posttests; t (727) = 22.162, p ≤0.005. (Theme1. Improved cognitive knowledge acquisition--S/T 1. Robust and immediate knowledge acquisition post-intervention). Specifically, in pre test, the medical stu…	Not assessed	Not assessed
5	Acharya, R., Mishra, S. B., Ipsita, S., & Azim, A. (2019).	Impact of nursing education on CLABSI rates: an experience from a tertiary care hospital in eastern India.	Quantitative	To assess the effect of the educational interventionto on nurses knowledge and percentage of their non-compliance with hand hygiene practice.	India	Quasi-Experimental (With pre-posttest)	Nurse	34	--	1hrs	Education program	N/A	The study employed a three-phase, before-and-after evaluation design targeting nurses to reduce Central Line-Associated Bloodstream Infection (CLABSI) rates. Phase I (Pre-intervention) involved collecting baseline data on CLABSI rates and hand hygiene compliance over six months (November 2015 to April 2016) and administering a pre-test to assess nurses' central venous catheter care practices. Pha…	Not assessed	The program significantly improved nurses' knowledge scores, which increased from a mean of 15.9 (± 3.3) in the pre-test to 17.7 (± 2.1) immediately post-test (Theme1. Improved cognitive knowledge acquisition) This knowledge gain showed modest sustainability over time, remaining higher at 17.3 (± 1.9) at three months and 17.0 (± 2.0) at six months (p=0.011). (Subtheme: Robust sastained knowledge …	The intervention had a significant immediate impact on practice, dramatically reducing participants' non-compliance with hand hygiene from 53.4% before the intervention to 17.1% immediately after the training (Theme1. Immediate clinical practice improvement). However, this change was not sustained over time, as non-compliance progressively rose, reaching 33.7% at three months and nearly returning…	The program led to a statistically significant reduction in the CLABSI rate. The rate decreased from 12.5 per 1,000 catheter days pre-intervention (over 1,200 catheter days) to 8.6 per 1,000 catheter days post-intervention (over 1,870 catheter days) (P=0.02) (Theme 1: Immediate decreased in CLABSI rate). The intervention did not show a significant reduction in the total number of catheter days it…
6	Staveski, S. L., Parveen, V. P., Madathil, S. B., Kools, S., & Franck, L. S. (2016).	Parent education discharge instruction program for care of children at home after cardiac surgery in Southern India.	Quantitative	To evaluate the effectiveness of a structured nurse-led parent discharge teaching programme on nurse, parent, and child outcomes in India	India	Quasi-Experimental (With pre-posttest)	Nurses	63	---	No repported	Education discharge instruction program	N/A	he intervention for the nursing staff was a comprehensive, multi-modal training program designed to ensure Nurse Mastery of the home care content necessary for effective parent discharge teaching. The intervention began with a computer-based training course delivered to nearly all cardiac surgery unit nurses, covering content domains such as signs of infection, medication administration, surgical…	Not assessed	The program successfully impacted nurses' knowledge, as nurses' knowledge scores on the Nursing Mastery Test (0–30 scale) increased substantially from a pre-training mean of 24.4 (SD = 2.89) to 27.4 (SD = 1.55) immediately post-training (p<0.005) (Theme1. High initial cognitive knowledge acquisition improved). However, a major limitation was revealed in the sustainability of this learning: the kn…	The intervention was highly effective at immediately changing the nurses behaviors related to clinical practice, as the proportion of documented discharge teaching in medical records drastically increased from 53% before the program to 95% after its implementation (p<0.005) (Theme1. Immediate, significant improvement in documentation compliance). This behavioral change in documentation was well-m…	Despite the lack of sustained knowledge at Level 2, the program demonstrated a critical impact on patient outcomes. There was a significant reduction in surgical-site infections from 26.7% to 1.9% (p<0.005) (Theme 1: Major reduction in patient morbidity (SSIs). This confirms a positive institutional result in patient safety even though it did not show any significant impact on the hospital costs …
7	Charafeddine, L., Badran, M., Nakad, P., Ammar, W., & Yunis, K. (2016).	Strategic assessment of implementation of neonatal resuscitation training at a national level.	Quantitative	To evaluate the implementation strategies of formal training using the NRP in a private sector context of a middle income country	Libanon	Quasi-Experimental (With pre-posttest)	Nurses (99), and Midwives (20)	119	Physician (128)	8h	Neonatal resuscitation program	N/A	The Neonatal Resuscitation Program (NRP) intervention involved the national implementation of training across Lebanon, targeting a wide range of healthcare providers, including doctors, nurses, and midwives. The program was executed in two systematic phases via workshops held bimonthly across various locations to ensure national coverage and was structured into two key phases. The initial Trainin…	The program achieved strong acceptance and positive feedback from participants. The majority of the participants (90%) rated the workshop as excellent or good in all aspects of the evaluation questionnaire, indicating high satisfaction with the quality and delivery of the training (Theme 1. High participants satisfaction. Subtheme. Positive affective response to content and delivery).	The training resulted in a significant and substantial increase in learning outcomes. Participants' overall average knowledge scores on the pre-training test increased significantly from 67.25% (±16.00) to 87.48% (±11.89) in the post-test (P=0.000) (Theme1. High initial cognitive knowledge acquisition). While all professions improved, Registered Nurses (RN) showed the highest mean score improveme…	Not assessed	The NRP training achieved significant success at the highest level of evaluation, leading to measurable positive patient and system changes. The program significantly decreased the neonatal mortality rate before hospital discharge; the Odds Ratio (OR) dropped from 1.53 (95% CI: 1.18−1.98) pre-intervention (2006) to 0.72 (95% CI: 0.54−0.96) after implementation (2013) (Theme 1: Major reduction in …
8	De Silva, A. P., Stephens, T., Welch, J., Sigera, C., De Alwis, S., Athapattu, P., ... & Haniffa, R. (2015).	Nursing intensive care skills training: a nurse led, short, structured, and practical training program, developed and tested in a resource-limited setting.	Quantitative	To assess the impact of a nurse-led, short, structured training program for intensive care unit (ICU) nurses in a resource-limited setting.	Sri Lanka	Quasi-Experimental (With pre-posttest)	Nurses	117	--	3 days	Nursing Intensive Care Skills Training (NICST) program	N/A	The Nursing Intensive Care Skills Training (NICST) course was a 3-day, short, structured, and practical training program developed in collaboration with Sri Lankan and overseas resource personnel based on an identified need for formal critical care training among nurses working within the NICS network. The course content, which was delivered entirely in English, was directly derived from a needs …	The intervention achieved high favorability among the participants. More than 90% of the nurses found the course to be enjoyable, culturally acceptable (satisfaction), worthwhile, and of a high standard, confirming that the format and content were popular (Theme 1. High participants satisfaction and cultural acceptability).	The training was highly effective at increasing both knowledge and practical skills. Knowledge scores improved significantly, with the mean score rising from 36.7 (SD 17.8) in the pre-test to 63.6 (SD 15.3) in the post-test (P<0.0001) (Theme1. High initial cognitive knowledge acquisition). Regarding skills, most participants were able to successfully demonstrate their ability in core assessments:…	Not assessed	Not assessed
9	Lancaster, R. J., Kautzmann, C., Micheal, J. C. J., Chandrasekaran, L., Jambunathan, J., & Chapin, T. M. (2017).	Attitudes of nurses towards care of the dying patient in India.	Quantitative	To examine and describe nurses’ attitudes when caring for dying patients in India, and whether participation in an educational conference, which included two scenario-based, low-fidelity simulations increased knowledge of end-of-life care.	India	Quasi-Experimental (With pre-posttest)	Nurses	101	No	In one day, but not intervention duration provided	Education program	N/A	The intervention was a one-day educational program held during the Fourth International Nursing Conference in Chennai, India, focusing on the theme 'End of life Issues: Nurse Facilitating the Dying and Mourning Process'. The program combined theoretical education with active, experiential learning via scenario-based, low-fidelity simulations. The educational modules, delivered by US and Indian nu…	Not assessed	Participation in the educational conference and EOL care simulations significantly increased participants knowledge. The mean knowledge score increased from 8.49 (SD=2.45) pre-simulation to 10.75 (SD=1.73) post-simulation (P<0.05) (Theme1. High initial cognitive knowledge acquisition). Nurses demonstrated mostly positive attitudes about caring for dying patients. The mean attitude score (FATCOD-B…	Not assessed	Not assessed
10	Hassan, Z. M., & Wahsheh, M. A. (2017).	Knowledge level of nurses in Jordan on ventilator‐associated pneumonia and preventive measures.	Quantitative	To identify the level of nurses’ knowledge of ventilator-associated pneumonia and prevention measures before and after an educational programme and reasons for not applying ventilator-associated pneumonia prevention measures	Jordan	Quasi-Experimental (With pre-posttest)	Nurses	428	No	5hours	Education program	N/A	The intervention was a one-day educational program consisting of seven modules delivered over a total of 5 hours (2 hours of lectures followed by 3 hours of small group discussion). The core content covered orientation to nosocomial infection control, VAP pathophysiology, VAP etiology and contributing factors, VAP assessment, VAP prevention measures, hand hygiene, and basic principles of patient …	Not assessed	The educational program led to statistically significant improvements in mean knowledge scores across all three domains of VAP knowledge, moving nurses from Weak or Good overall knowledge to an Excellent knowledge level. The participants pathophysiology mean score increased from 1.29(1.08) to 3.61(0.62), risk factors 1.24 (1.02) to 2.66 (0.76) and preventive measures 4.11 (2.32) to 11.52(1.53) (P…	Not assessed	Not assessed
11	Bull, E. R., Mason, C., Junior, F. D., Santos, L. V., Scott, A., Ademokun, D., ... & Cavanagh, S. M. (2017).	Developing nurse medication safety training in a health partnership in Mozambique using behavioural science. Mixed Method / Quanti part.	Mixed: Quantitative	To explore the initial impact of an international health partnership’s work to develop a drug calculation workshop for nurses in Beira, Mozambique	Mozambique	Pre- and post study	nurses	123	No	2 hours training over consecutive 2 days.	Medication safety training	N/A	The intervention was a two-phase medication safety training program for primary care nurses, delivered primarily by a local pharmacist. Phase One focused on adapting an existing PowerPoint presentation based on a needs assessment (including audit and discussions). This content covered various drug calculations (doses, infusions, dilutions, conversions) and was translated into Portuguese. Health p…	All 49 comments received immediately after training indicated positive reception. Participants described the drug calculation game as really good and fantastic because it opened the mind more and promoted long-term retention (Theme 1. High participant satisfaction with novel methodology) . Several participants also expressed intentions for future practice, such as paying more attention to how to …	During the Phase Two revised CPD workshop, teams correctly answered 16 out of 22 questions during the game (Improved skills) (Theme1. Successful application of knowledge in training scenario). Participants reported high confidence in their drug calculation skills both before and after the refresher training (Attitudes Changed) (Theme 2. Baseline high self-reported clinical confidence) . However, …	Not assessed	Not assessed
12	LaVigne, A. W., Gaolebale, B., Maifale-Mburu, G., Nwogu-Onyemkpa, E., Sebego, M., Chiyapo, S. P., ... & Grover, S. (2018).	Strengthening palliative care delivery in developing countries: a training workshop model in Botswana.	Quantitative	To present a model for a palliative care training workshop that successfully increased the palliative care knowledge base and skill set in a group of nurses in a developing country setting.	Botswana	Quasi-Experimental (With pre-posttest)	Nurses	15	No	2 days	Palliative care workshop training	N/A	The intervention was a 2-day palliative care workshop conducted on October 6–7th, 2014, in Gaborone, Botswana. Fifteen nurses attended, primarily from the public oncology center and a local hospice. The workshop consisted of blocks of 1-hour sessions taught by expert faculty, including a palliative care physician from Botswana, a doctorally prepared nurse from the University of Botswana, and a pa…	Not assessed	The intervention resulted in a statistically significant increase (P=0.001) in overall knowledge. The average score increased from 46.18% (pre-test) to 64.27% (post-test) (Theme1. High initial cognitive knowledge acquisition) . 90% (9 out of 10) of participants demonstrated improvement in their post-test scores (Subtheme: Widespread individual knowledge gain).	Not assessed	Not assessed
13	Shah S, Santos N, Kisa R, Mike Maxwell O, Mulowooza J, Walker D, et al. (2020)	Efficacy of an ultrasound training program for nurse midwives to assess high-risk conditions at labor triage in rural Uganda.	Mixed: Quantitative	To evaluate the 2-week training curriculum and trainees’ ability to perform a standard scanning protocol and interpret ultrasound images	Uganda	Quasi-Experimental (With pre-posttest)	Nurse Midiwives (20) , Nurses (3)	23	Physicians (2)	2-weeks	Ultrasound training program	N/A	The point-of-care ultrasound training program for nurse midwives in rural Uganda was rolled out in two phases: Phase 1 involved 11 clinicians from a District Hospital (DH) who underwent a two-week training with daily hour-long lectures and hands-on scanning practice, sometimes while performing clinical duties. Phase 2 involved 14 clinicians from three Health Centers (HCs) and was modified based o…	Noted assessed	The training dramatically improved participant confidence, which went from zero confidence pre-course (as none had performed an exam) to a high mean confidence score (ranging from 5.60 to 6.63 out of a likely 7-point scale). (change attitude) (Theme 1. Acquisition of high self-reported clinical confidence) The intervention successfully developed technical skills, as evidenced by a high pass rate …	Noted assessed	Noted assessed
14	Raney, J. H., Morgan, M. C., Christmas, A., Sterling, M., Spindler, H., Ghosh, R., ... & Walker, D. M. (2019).	Simulation-enhanced nurse mentoring to improve preeclampsia and eclampsia care.	Mixed: Quantitative	To assess the impact of simulationbased training on PE/E diagnosis and management in Bihar by evaluating changes in nurse mentees’ use of EBPs in simulated PE/E cases and exploring perceived barriers and enablers of high quality PE/E care among nurse mentors.	India	Quasi-Experimental (With pre-posttest)	Nurse midiwives	3422	No	8months	Simulation-based training	N/A	The intervention was a statewide, high-fidelity simulation-enhanced nurse mentoring program developed by PRONTO International and implemented in collaboration with CARE India, embedded within the larger AMANAT nurse mentoring program in Bihar, India. This mixed-methods study aimed to improve the use of evidence-based practices (EBPs) for preeclampsia and eclampsia (PE/E) diagnosis and management …	Noted assessed	The simulation-enhanced mentoring program demonstrated significant improvements in the nurse mentees' practical skills and efficiency in managing preeclampsia and eclampsia. The intervention significantly enhanced the mentees' clinical assessment ability, as evidenced by a substantial increase in the median number of total history questions asked (from 1.0 to 2.0, p=0.03), particularly their abil…	Noted assessed	Noted assessed
15	Mwansisya, T., Mbekenga, C., Isangula, K., Mwasha, L., Mbelwa, S., Lyimo, M., ... & Temmerman, M. (2022).	The impact of training on self-reported performance in reproductive, maternal, and newborn health service delivery among healthcare workers in Tanzania	Quantitative	To investigate the effectiveness of training with onsite clinical mentorship towards self-reported performance in RMNH among healthcare workers in Mwanza Region, Tanzania.	Tanzania	Quasi-Experimental (With pre-posttest)	Nurses & midwives		Medical specialists	No repported	Training and onsite mentorship program	No training program	The intervention was a comprehensive, two-part strategy combining Continuous Professional Development (CPD) short courses with sustained onsite clinical mentorship for healthcare workers in Reproductive, Maternal, and Newborn Health (RMNH) in the Mwanza Region of Tanzania. The program was meticulously tailored, starting with a Training Needs Analysis (TNA) at baseline to identify and prioritize s…	Noted assessed	The intervention demonstrated significant success in improving the healthcare workers' self-reported clinical skills in Reproductive, Maternal, and Newborn Health (RMNH). The overall mean performance score in the intervention group showed a significant improvement from 238.97 (SD 64.90) before the intervention to 283.35 (SD 34.02) after the intervention (t=5.89,df=94,p≤0.001) (Theme 1. Significan…	Noted assessed	Noted assessed
16	Gyamfi, J., Plange-Rhule, J., Iwelunmor, J., Lee, D., Blackstone, S. R., Mitchell, A., ... & Ogedegbe, G. (2017).	Training nurses in task-shifting strategies for the management and control of hypertension in Ghana: a mixed-methods study.	Mixed: Quantitative	To assess nurses’ knowledge and practice of hypertension management and control pre- and post-training utilizing task-shifting strategies for hypertension control in Ghana (TASSH).	Ghana	Quasi-Experimental (With pre-posttest)	Nurses	64	No	12days	Training program on task-shifting strategy for hypertension	No	The Task-Shifting Strategy for Hypertension Control in Ghana (TASSH) training was a centralized, in-person program delivered by clinical hypertension specialists and experienced study staff starting in August 2012 and recurring every six months for an average of four sessions. The program targeted Community Health Nurses (CHNs) and Enrolled Nurses (ENs) to train them in essential hypertension man…	Noted assessed	The TASSH training resulted in a marked improvement in the nurses' knowledge and proficiency in hypertension management. Proficiency was measured by scoring 80% or more on the 19-multiple-choice-question Hypertension Knowledge Assessment. The rate of proficiency increased dramatically: at baseline, only 26.9% of the nurses were considered proficient at hypertension management, which rose signific…	Noted assessed	Noted assessed
17	Kirkpatrick, J. N., Nguyen, H. T., Do Doan, L., Le, T. T., Thai, S. P., Adams, D., ... & Banchs, J. (2018).	Focused cardiac ultrasound by nurses in rural Vietnam.	Quantitative	To assess the accuracy of nurse-performed FCU to screen adult subjects at a village health center in Vietnam.	Viet Nam	Quasi-Experimental (With pre-posttest)	Nurses	8	No	6hrs	Focused Cardiac Ultrasound training program	No	The intervention consisted of a 6-hour structured Focused Cardiac Ultrasound (FCU) training program conducted by sonographers and physicians for eight Vietnamese nurses (including recent graduates and those practicing at rural village health centers), none of whom had previous formal training in cardiac ultrasound acquisition or interpretation. The training was centralized at the Vietnam National…	.	The structured 6-hour training successfully improved the nurses' knowledge and initial practical skills in focused cardiac ultrasound. On the pre- to post-test designed to assess recognition of abnormal parasternal long-axis (PLAX) images, every nurse improved, with an average improvement in correct answers of 21% (ranging from 2% to 31%) (Theme 1. High initial cognitive gain in image recognition…	The ability to apply the 6-hour training to perform Focused Cardiac Ultrasound (FCU) in the village health center—was quantitatively assessed against a comprehensive echocardiography exam. When performing the scan to detect significant cardiac abnormalities, the new nursing behavior demonstrated an initial acceptable level of accuracy. Specifically, the nurse-performed FCU (NURSEFCU) achieved a s…	The application of NURSEFCU resulted in a more effective screening and triage strategy, demonstrating a direct impact on the ability to detect significant disease in an underserved population. The primary result was the high diagnostic value of the test, particularly when integrated with existing methods (Theme 1. Optimal screening effectiveness through combined strategy). While NURSEFCU alone ha…
18	Ndikom, C. M., Ofi, B. A., Omokhodion, F. O., Bakare, P. O., & Adetayo, C. O. (2019).	Effects of educational intervention on nurses’ knowledge and attitude towards providing cervical cancer screening information in selected health facilities in Ibadan, Nigeria.	Quantitative	To evaluate the effects of an educational intervention (EI) on nurses’ knowledge and attitude towards providing CCS information.	Nigeria	Quasi-Experimental (With pre-posttest)	Nurses	133	No	3 days	Educational Intervention	No education program	The educational intervention (EI) was a quasi-experimental study conducted in eight health facilities in Ibadan, Nigeria. It utilized an EI package adapted from the WHO's Nurses' Training Manual on Cervical Cancer Control to sensitize nurses on recognizing cervical cancer as a major reproductive health problem. The intervention package consisted of five modules and one practical counselling and t…	Noted assessed	At baseline, the nurses in the Intervention Group (IG) and Control Group (CG) had comparable mean knowledge scores, with the IG scoring (11.78 ±3.29 and the CG scoring (11.71±3.25), showing no significant statistical difference (t=0.125, p=0.901). The Educational Intervention (EI) significantly improved the nurses' knowledge in the IG at post-intervention (PI), where their mean knowledge score in…	Noted assessed	Noted assessed
19	Do Thi, N., Thi, G. H., Lee, Y., Minh, K. P., Thanh, H. N., Shin, J. S., & Luong Xuan, T. (2024).	First-aid training for primary Healthcare providers on a remote Island: a mixed-methods study.	Mided: Quantitative	To evaluate the effectiveness of a first-aid training program for PHPs on a Vietnamese island and explored their perspectives and experiences regarding first-aid implementation.	Viet Nam	Quasi-Experimental (With pre-posttest)	Nurses (14) & Midwives (9)	23	Physicians (16)	2 days	First Aid training program	No	The first-aid training program was delivered face-to-face over two days. The curriculum covered both theoretical and practical training across five dimensions: basic life support (BLS), drowning, bleeding, fractures, and burns. The theoretical aspects were taught using didactic lectures, videos, and case studies. For the practical sessions, the 39 participants were divided into seven groups (six …	Noted assessed	The first-aid training program resulted in a significant increase in the overall mean knowledge scores among the Primary Healthcare Providers (PHPs). The average knowledge score jumped from 3.36 (0.70) at pretest to 4.62 (0.36) immediately post-training, demonstrating a highly statistically significant improvement (p < 0.001) (Theme1. High initial cognitive knowledge acquisition). Crucially, this…	Noted assessed	Noted assessed
20	Vail, B., Morgan, M. C., Spindler, H., Christmas, A., Cohen, S. R., & Walker, D. M. (2018).	The power of practice: simulation training improving the quality of neonatal resuscitation skills in Bihar, India.	Quantitative	To evaluate the impact of PRONTO International simulation training on the quality of NR skills in simulated resuscitations and live deliveries in rural PHCs throughout Bihar, India	India	Quasi-Experimental (With pre-posttest)	Nurses	1342	No	6 days	PRONTO Simulation training	No	The PRONTO International training, implemented within CARE India's AMANAT quality improvement project, used a train-the-trainer model to provide in-situ simulations on neonatal resuscitation (NR) and obstetric emergencies to Auxiliary Nurse Midwives (ANMs) and General Nursing and Midwifery (GNM) mentees in rural Primary Health Centers (PHCs) throughout Bihar, India. The training was supplemented …	Noted assessed	The intervention demonstrated a statistically significant improvement in the mentees’ technical Neonatal Resuscitation (NR) skills within a simulated environment when comparing Week 4 to Week 8 assessments. Key skill improvements were observed, including a 13.5 percentage-point increase in performing proper neck extension (p=0.01), a 19.0 percentage-point increase in delivering Positive Pressure …	Mentees successfully transferred several skills to the live clinical setting, with significant improvements noted in deliveries requiring resuscitation when comparing the early weeks (1-3) to the later weeks (4-8) of training (Theme 1. Improved adoption of critical neonatal resuscitation practices in live deliveries). The percentage of deliveries where identification of non-vigorous neonates was …	Noted assessed
21	Staveski, S. L., Zhelva, B., Paul, R., Conway, R., Carlson, A., Soma, G., ... & Franck, L. S. (2015).	Pediatric cardiac surgery Parent Education Discharge Instruction (PEDI) program: a pilot study.	Quantitative	To generate preliminary data on the feasibility and acceptability of the nurse-led structured discharge program on an Indian pediatric cardiac surgery unit.	India	Quasi-Experimental (With pre-posttest)	Nurses	40	No		Education Discharge Instruction	No	The intervention described is the Parent Education Discharge Instruction (PEDI) program, a structured, nurse-led initiative designed to improve postcardiac surgery outcomes for children in resource-constrained settings, such as Indian cardiac centers, by enhancing parental knowledge and mastery of home care. The program was developed over two years, beginning with a needs assessment that confirme…	Nurse participants reported high satisfaction with teaching parents post-discharge care (M = 3.95, SD= 0.23) and felt good about their work (M= 4.00) (Theme 1. High participant satisfaction and positive affect). They found the PEDI program useful and supportive, reporting that the training recommendations were feasible (M = 3.68, SD = 0.48) and increased the depth of information they provided to …	The intervention led to a statistically significant improvement in nurse knowledge scores, which increased from 80.5 in the pretest to 95.7 in the posttest (P < 0.001) (Theme1. High initial cognitive knowledge acquisition).	Noted assessed	Noted assessed
22	Kumar, R., Somrongthong, R., & Ahmed, J. (2016).	Effect of medical waste management trainings on behavior change among doctors versus nurses and paramedical staff in Pakistan.	Quantitative	To determine the differences in knowledge, attitude and practices of physicians versus nursing and paramedical staff about standard health care waste management	Pakistan	Quasi-Experimental (With pre-posttest)	Nurses &paramedical (142)		Physicians (80)		Waste management trainings	No	The intervention was a Medical Waste Management (HCWM) training program delivered to healthcare workers across two tertiary care hospitals in Rawalpindi, Pakistan, in a quasi-experimental study design. The core purpose of the training was to improve the knowledge, attitude, and practices of staff (doctors, nurses, and paramedical personnel) regarding standard HCWM to strengthen their practices an…	Noted assessed	The intervention produced mixed results across the learning domain, with significant statistical differences found between doctors and nursing/paramedical staff at the 18-month follow-up (p < 0.05 or p< 0.001) While the training significantly improved knowledge for both groups, the nursing and paramedical staff demonstrated a greater retention of high-level knowledge, with 41.5% achieving this sc…	The overall behavioral outcome was negative, especially for doctors. The nursing and paramedical staff proved more compliant and retained better practices and knowledge compared to doctors (Theme 1. Superior sustained behavioral compliance in nursing/paramedical staff). The study concluded that the behavior of nurses/paramedical staff was more compliant due to their more frequent, direct involvem…	Noted assessed
23	Agrawal, N., Bhargava, S., Usmanova, G., Srivastava, A., Kumar, S., Mahajan, S., ... & Sood, B. (2021).	Evaluating the effect of strengthening nurse midwifery pre-service education in two Indian states: A single group pre–and post–intervention study. Nurse Education Today, 96, 104640.	Quantitative	To evaluate the effect of PSE strengthening program on institutional performance and maternal neonatal health (MNH) related competences of nursing midwifery students and faculty.	India	Quasi-Experimental (With pre-posttest)	Nurse midwifery		No		Pre-service education	No	The Pre-Service Education (PSE) strengthening program was initiated in April 2013 to improve the quality of nursing-midwifery education in 133 public sector institutions across the four high-focus Indian states of Madhya Pradesh, Bihar, Odisha, and Rajasthan. With technical assistance from Jhpiego , the intervention focused on implementing a set of performance standards (79 to 81, depending on th…	Noted assessed	The intervention led to significant improvements in the Maternal Neonatal Health (MNH) related competences of both students and faculty, as measured by the Objective Structured Clinical Examination (OSCE). For students, the mean overall OSCE score dramatically increased from 17.1 (8.0) at baseline to 66.4 (8.0) at endline (p<0.001), with the proportion of competent students (those scoring ≥75%) r…	A significant organizational change was achieved, demonstrating improved institutional capacity and performance. The intervention successfully helped institutions meet the quality benchmark of 70% of the prescribed performance standards (Theme 1. Successful institutional capacity and performance adoption). While none of the 15 sampled institutions met this standard at baseline, the program succes…	Noted assessed
24	Agrawal, N., Kumar, S., Balasubramaniam, S. M., Bhargava, S., Sinha, P., Bakshi, B., & Sood, B. (2016)	Effectiveness of virtual classroom training in improving the knowledge and key maternal neonatal health skills of general nurse midwifery students in Bihar, India: a pre-and post-intervention study. Nurse education today, 36, 293-297.	Quantitative	To evaluate the effectiveness of virtual classroom training in improving the MNH-related skills of the nursing-midwifery students in Bihar, India.	India	Quasi-Experimental (With pre-posttest)	Nurse-midwifery	83	No		Virtual classroom training	No	The intervention was a Virtual Classroom Training Program implemented in selected public sector nursing-midwifery institutions in Bihar, India, to address the sub-optimal quality of education and shortage of faculty. The program leveraged Cisco's Education Enabled Development (CEED) technology to establish virtual classrooms in 4 ANM and 3 GNM institutions. The College of Nursing (CoN) at IGIMS, …	Noted assessed	The intervention demonstrated a statistically significant and substantial improvement in the Maternal Neonatal Health (MNH) knowledge and clinical skills of the GNM students. The mean overall score assessed by the Objective Structured Clinical Examination (OSCE) increased dramatically from 21.3 pre-intervention to 62.0 post-intervention (p<0.001) (Theme 1. Significant improvement in MNH clinical …	Noted assessed	Noted assessed
25	Ahmed, F. A., Choudhary, R. A., Khan, H., Ayub, F., ul Hassan, S. S., Munir, T., ... & Latif, A. (2023).	Incorporating a patient safety and quality course into the nursing curriculum: an assessment of student gains. Journal of patient safety, 19(6), 408-414.	Quantitative	To evaluate the impact of quality and PS course on the knowledge, and system thinking of students at different stages of the undergraduate nursing course	Pakistan	Quasi-Experimental (With pre-posttest)	Nurses	139	No	4.5days	Quality and patient safety training program	No	The intervention was a 4.5-day Patient Safety (PS) and Quality Improvement (QI) course for 2nd and 4th year undergraduate nursing students. The course was an adaptation of a 3-day PS course from Johns Hopkins University School of Medicine, modified with local, contextualized examples for nursing students. It consisted of lectures, case-based interactive discussions and activities, and hands-on sk…	The students reported a positive overall experience in their narrative reflections. The most frequently emerging theme, mentioned by 52% of all students, was the importance of teamwork and communication (Theme 1: self-reported positive utility of the program). Other highly mentioned themes included the importance of patient safety (44%) and the value of using standardized tools such as checklists…	The intervention significantly increases the students’ both knowledge and system thinking for both student groups. In the knowledge assessment (out of 20 points), mean scores significantly improved for second-year students from 13.72 ± 3.48 in pretest to 18.64 ± 2.44 in posttest and for fourth-year students from 13.04 ± 2.86 in pretest to 16.5 ± 2.56 in posttest (P<0.001) (Theme1. Theme: High ini…	Noted assessed	Noted assessed
26	Arlington, L., Kairuki, A. K., Isangula, K. G., Meda, R. A., Thomas, E., Temu, A., ... & Nelson, B. D. (2017)	Implementation of “helping babies breathe”: a 3-year experience in Tanzania. Pediatrics, 139(5).	Quantitative	To evaluate program coverage, determine the impact of HBB training on provider skills over time through testing on newborn mannequins, understand providerlevel acceptability and perceptions of HBB in Tanzania, and identify the barriers and challenges to implementing HBB at scale	Tanzania	Quasi-Experimental (With pre-posttest)	nurses & nursemidwives	6783	Physicians (6386)	1 day	HBB training program	No	The Helping Babies Breathe (HBB) program, an adaptation of the American Academy of Pediatrics' curriculum, was rolled out in 15 of Tanzania's mainland regions between May 2013 and December 2014. The training was conducted by national and district trainers, who were selected from a pool of HBB master trainers and received refresher courses. The trainings were hosted at or near regional and distric…	Overall, participants reported a positive experience with the Helping Babies Breathe (HBB) training, finding that they felt more confident and better equipped to perform newborn resuscitation (Theme 1. Self-reported positive experience and increased confidence). The birth attendants specifically noted that the HBB equipment helped to simplify the resuscitation process (Subtheme. Perceived program…	The HBB intervention demonstrated a significant improvement in participant skills immediately following the training, with 87.1% of providers passing the Objective Structured Clinical Examination (OSCE) (Theme 1. Significant initial improvement in HBB clinical compentences). However, this improvement was not maintained over time. The passing rate dropped to 55.8% at the 4-to 6-month follow-up (Su…	Noted assessed	Noted assessed
27	Bang, A., Patel, A., Bellad, R., Gisore, P., Goudar, S. S., Esamai, F., ... & Hibberd, P. L. (2016).	Helping Babies Breathe (HBB) training: What happens to knowledge and skills over time?. BMC pregnancy and childbirth, 16, 1-12.	Quantitative	To evaluate the effect of HBB training on neonatal resuscitation skills and knowledge, as well as retention of knowledge and skills by physicians and nurses who attended deliveries in facilities.	India and Kenya	Quasi-Experimental (With pre-posttest)	Nurses	779	Physicians (6386)		HBB training program	No	The intervention involved implementing the Helping Babies Breathe (HBB) program, a simulation-based neonatal resuscitation curriculum, across 71 facilities in the NICHD Global Network sites in India and Kenya. The rollout was conducted in three stages: a 4-day intensive training-of-trainers (ToT) for facility Master Trainers (MTs), followed by a 3-day on-site initial course for Birth Attendants (…	Noted assessed	The initial Helping Babies Breathe (HBB) training led to a significant and substantial improvement in participant knowledge. The percentage of Birth Attendants (BAs) passing the knowledge test surged from 74% pre-training to 99% post-training (p < 0.0001). This high level of knowledge was largely sustained, with 93.3% of participants passing the knowledge test following the refresher training (Th…	Noted assessed	Noted assessed
28	Cavicchiolo, M. E., Cavallin, F., Bertuola, F., Pizzol, D., Segafredo, G., Wingi, O. M., ... & Trevisanuto, D. (2018).	Effect of a low-dose/high-frequency training on real-life neonatal resuscitation in a low-resource setting. Neonatology, 114(4), 294-302.	Quantitative	To assess the impact of a low-dose/high-frequency neonatal resuscitation training on clinical practice of midwives in a low-resource setting.	Mozambique	Quasi-Experimental (With pre-posttest)	Midwives	16	No	6months	Neonatal resuscitation training program	No	The intervention began with an adapted version of the Neonatal Resuscitation Program (NRP) 6th edition algorithm, which excluded the use of pulse oximetry, intubation, and medications, and was taught to all 16 participating midwives at Beira Central Hospital. This initial course was followed approximately eight months later by a low-dose/high-frequency training that lasted six months and was desi…	Noted assessed	The adapted NRP course initially improved the overall practical skills of the midwives, as evidenced by a significant improvement in the composite scores for initial steps (p<0.0001), bag-mask ventilation (BMV) (p=0.005), and chest compressions (CC) (p=0.03) (Theme 1. Significant improved in overall NR practical skills). The subsequent low-dose/high-frequency training successfully maintained thes…	While the timing of interventions generally remained longer than recommended by the NRP algorithm, the low-dose/high-frequency training did result in significant changes to the speed of clinical practice. The total time of the resuscitation procedure decreased significantly after the retraining (p<0.0001), although it had remained stable after the initial course (p=0.89) (Theme 1. Change in Clini…	The study observed a marked reduction in patient mortality following the educational interventions. The number of neonatal deaths was significantly lower in the group after the low-dose/high-frequency training (3 deaths, 6%) compared to the group before the course (13 deaths, 26) and the group after the course (14 deaths, 28%), with an overall statistically significant difference (p=0.007) (Theme…
29	Chao, H. C., Kaas, M., Su, Y. H., Lin, M. F., Huang, M. C., & Ba, J. J. (2016).	Effects of the advanced innovative internet-based communication education program on promoting communication between nurses and patients with dementia. Journal of Nursing Research, 24(2), 163-172.	Quantitative	To evaluate the effects of the AIICE program on nurses’ communication knowledge and attitudes, frequency to assess the communication capacity of patients, and communication performance when communicating with people with dementia	Taiwan	Quasi-Experimental (With pre-posttest)	Nurses	107	No	8hours	Innovative Internet-Based Communication Education Program	No	The intervention, known as the Advanced Innovative Internet-Based Communication Education (AIICE) program, was developed by field experts and utilized a blended-learning approach combining classroom instruction with self-directed, Internet-based learning over four distinct modules. Module 1 was a 4-hour classroom lecture that introduced staff nurses to the underlying meanings of behavior and psyc…	Noted assessed	The intervention demonstrated a significant and sustained positive impact on nurses’ learning. Communication Knowledge scores, measured by the Communication Knowledge Scale–Chinese version, significantly increased from a baseline mean of 62.42 (±1.34) to 69.79 (±1.34) at 4 weeks post-intervention, and this improvement was further maintained and enhanced at 16 weeks with a mean score of 73.25 (±1.…	Noted assessed	The training program demonstrated a positive impact on key patient-level clinical outcomes. The intervention resulted in a significant reduction in patient difficulties related to memory and behavioral problems, which decreased from a pretest mean score of 51.96 (±1.44) to 49.52 (± 1.44) at 14 weeks after the intervention (P = 0.004) (Theme 1. Decreased patient memory and behavioral problems--hea…
30	Creanga, A. A., Jiwani, S., Das, A., Mahapatra, T., Sonthalia, S., Gore, A., ... & Shah, H. (2020).	Using a mobile nurse mentoring and training program to address a health workforce capacity crisis in Bihar, India: Impact on essential intrapartum and newborn care practices. Journal of global health, 10(2), 021009.	Quantitative		India	Quasi-Experimental (With pre-posttest)	Nurses	1.892	No	6-8months	AMANAT intervention (Mobile nurse mentoring and training program)	No	The AMANAT intervention was an on-the-job, on-site program utilizing nurse-mentors—who possessed BSc nursing degrees and at least two years of experience in Basic Emergency Obstetric and Neonatal Care (BEmONC)—recruited across India and trained by master trainers. Pairs of nurse-mentors rotated weekly through four facility clusters over a period of 6–8 months, focusing on a "learning-by-doing" ap…	Noted assessed	The AMANAT intervention led to a substantial and statistically significant improvement in the nurse-mentees’ overall knowledge (P < 0.001). The percentage of questions answered correctly on the knowledge assessment increased from 38% at baseline to 68% at endline (Theme1. Substantial initial cognitive knowledge acquisition). This gain was reflected in the competency of the staff: only 17% of nurs…	The mentoring program successfully translated improved knowledge and skills into sustained changes in clinical practice. Mentored facilities showed a significant and durable uptake of both intrapartum and newborn care practices (Theme 1: Sustained change in intrapartum and newborn care practices) . Eighteen specific intrapartum practices were observed in 50% of deliveries at endline (P < 0.05) (S…	Noted assessed
31	Das, A., Nawal, D., Singh, M. K., Karthick, M., Pahwa, P., Shah, M. B., ... & Chaudhuri, I. (2016).	Impact of a nursing skill‐improvement intervention on newborn‐specific delivery practices: An experience from Bihar, India. Birth, 43(4), 328-335.	Quantitative	To evaluate the effectiveness of “Mobile Nurse Training,” a knowledge-based intervention for nurses to improve essential newborn-specific delivery practices	India	Quasi-Experimental (With pre-posttest)	Nurses	1467	No	6 months	Mobile Nurse Training program	No	The Mobile Nurse Training intervention was a knowledge-based program designed to improve the skill set of nurses working at rural health facilities in Bihar, India, with the objective of enhancing the quality of obstetric care. It was carried out by eight intervention teams, each comprising two highly skilled nurses (one per study district). Before beginning the intervention, the trainer nurses u…	Noted assessed	The intervention demonstrated a substantial improvement in several key newborn-specific delivery practices. The largest gains were observed in three critical areas: placing a newborn on the mother’s abdomen immediately after delivery, which increased from 64% pre-intervention to 89% post-intervention (Theme 1. Improved essential routine practical skills); the initiation of skin-to-skin care betwe…	The analysis using Adjusted Odds Ratios (AOR) provided strong evidence that nurses who participated in the training were significantly more likely to perform key essential newborn care practices. Nurses who completed the training had four times higher odds (AOR 4.17, CI 2.96–5.89) of placing the newborn on the mother’s abdomen immediately after birth during the post-intervention assessment compar…	Noted assessed
32	Das, A., Nawal, D., Singh, M. K., Karthick, M., Pahwa, P., Shah, M. B., ... & Chaudhuri, I. (2017).	Evaluation of the mobile nurse training (MNT) intervention–a step towards improvement in intrapartum practices in Bihar, India. BMC pregnancy and childbirth, 17, 1-11.	Quantitative	To evaluate the impact of a Mobile nurse training program on delivery-related practices in 80 facilities across eight districts of Bihar	India	Quasi-Experimental (With pre-posttest)	Nurses	842	No		Mobile nurse training program	No	The Mobile Nurse Training (MNT) intervention was a knowledge-based component of the IFHI (India Facility Health Initiative) designed to address gaps in the quality of intrapartum care at health facilities in Bihar, India. The program involved a partnership between the University of California San Francisco, PRONTO International, the University of Utah, CARE India, and the Government of Bihar (GoB…	Noted assessed	The intervention improved significantly the nurses’ correctly performing scores both essential newborn care and safe labor practices. For newborns, critical practices like placing the newborn on the mother’s abdomen immediately after birth increased from 64% to 89%, and initiation of skin-to-skin care rose from 35% to 60% (Theme 1. Improved essential routine practical skills). For managing neonat…	The MNT intervention showed a strong, statistically significant association with the nurses’ sustained adoption of improved clinical practices. The training was a powerful predictor of positive practice scores, with an Adjusted Odds Ratio AOR of 13.14 for improvement in the positive labor practice score and an AOR of 10.89 for the overall practice score (Theme: Improved nurses' odds of sustained …	Noted assessed
33	Downing, J., Batuli, M., Kivumbi, G., Kabahweza, J., Grant, L., Murray, S. A., ... & Leng, M. (2016).	A palliative care link nurse programme in Mulago Hospital, Uganda: an evaluation using mixed methods. BMC palliative care, 15, 1-13.	Mixed: Quantitavite	To evaluate the impact of the palliative care link nurse programme at Mulago Hospital	Uganda	Quasi-Experimental (With pre-posttest)	Nurses	27	No	5days	Link-nurse programme	No	The intervention is the Palliative Care Link Nurse Programme, a model implemented by the Makerere/Mulago Palliative Care Unit (MPCU) in Mulago Hospital, Uganda, to integrate palliative care (PC) into general hospital services. This program established a generalist-specialist PC model by selecting 27 practicing nurses from key wards to serve as Link Nurses. The core of the program was an adapted 5…	The training elicited a highly positive reaction from the participants, who reported that the course contents were useful and helpful (Theme: Self-reported usefullness of the program). They particularly appreciated the interactive nature of the training, along with the effectiveness of case discussions and scenarios (Subtheme: Appreciation for methodology) . Participants also recognized the impor…	The intervention demonstrated a significant improvement in participants' confidence levels across all areas assessed. The change was statistically significant, with ten variables showing improvement at p < 0.001 and three variables at p < 0.01 (Theme: Significant self-reported core practical skills improvement). The largest improvements in self-reported confidence were seen in three critical area…	The training successfully enabled the nurses to apply their new skills in their clinical environment. The Link Nurses identified a total of 2,447 patients with palliative care needs (Theme: Improved palliative care practice [case finding]). A large majority of these patients, 86%, were successfully managed by the Link Nurses on the wards (Subtheme: Successful uptake of generalist palliative care …	Noted assessed
34	Elnour, A. M., Moussa, M. M. R., El-Borgy, M. D., Fadelella, N. E. E., & Mahmoud, A. H. (2015).	Impacts of health education on knowledge and practice of hospital staff with regard to Healthcare waste management at White Nile State main hospitals, Sudan. International journal of health sciences, 9(3), 315.	Quantitative	To assess nursing and sanitation staff knowledge and practice regarding Healthcare Waste (HCW) management before and after the implementation of an educational intervention program at the main hospitals of the White Nile State in Sudan.	Sudan	Quasi-Experimental (With pre-posttest)	Nurses	200	Sanitation staff	2 weeks	Educational Intervention Program on Healthcare Waste (HCW) Management	Yes (No education)	The educational intervention program consisted of 6 comprehensive educational sessions delivered over a period of 2 weeks to the participating nursing and sanitation staff across 3 hospitals in Sudan. To accommodate the schedules of all participants, the staff were divided into different groups, attending sessions in the morning, afternoon, or evening. The program was designed based on participan…	Noted assessed	The educational intervention demonstrated a significant, sustained improvement in participant learning as measured by both knowledge and practice scores. Prior to the program, only 17% of staff possessed good knowledge, with the majority falling into the fair (58%) or poor (25%) categories. Immediately following the intervention, there was a substantial shift, with the percentage of staff having …	Noted assessed	Noted assessed
35	Kamath-Rayne, B. D., S. Josyula, A. R. L. Rule, and J. C. Vasquez. (2017)	Improvements in the delivery of resuscitation and newborn care after Helping Babies Breathe training." Journal of Perinatology 37, no. 10 (2017): 1153-1160.	Quantitative	To evaluate changes in neonatal resuscitation and postnatal care following Helping Babies Breathe (HBB) training at a community hospital in rural Honduras	Honduras	Quasi-Experimental (With pre-posttest)	Nurses	39	Physicians (31)	1day, 8hrs	Helping Babies Breathe training program	No	The intervention was the Helping Babies Breathe (HBB) Provider course, delivered as a 1-day, 8-hour workshop in August 2013 to a total of 70 healthcare personnel (physicians and nurses). Three workshops were conducted to accommodate the staff, and the course was taught entirely in Spanish by US-based HBB Master Trainers. The program covered the standardized steps necessary for immediate newborn r…	Noted assessed	Noted assessed	The study demonstrated significant and beneficial changes in the clinical behavior of the HBB-trained providers. The HBB training program showed a positive trend toward improved overall resuscitation practices, with trainees performing key steps more frequently (80.9%) compared to non-trainees (69.7%), though this difference was borderline statistically significant (P = 0.055) (Theme 1: Improved …	Noted assessed
36	Kumar, R., Somrongthong, R., & Shaikh, B. T. (2015)	Effectiveness of intensive healthcare waste management training model among health professionals at teaching hospitals of Pakistan: a quasi-experimental study. BMC health services research, 15, 1-7.	Quantitative	To assess the effectiveness of Intensive healthcare waste management (IHWM) training model at two tertiary care hospitals of Rawalpindi city, Pakistan.	Pakistan	Quasi-Experimental (With pre-posttest)	Nurses	43	Doctors (41) paramedics (28) and sanitary workers (26)	3 months	Intensive healthcare waste management training	No intervention : Routine activities on infectious health care waste management	The intervention was a three-month Infectious Healthcare Waste Management (IHWM) training model targeting hospital healthcare workers (HCWs). It consisted of three 6-hour training sessions delivered with a four-week interval between the first two. These sessions utilized modules adapted from WHO manuals and Indian Hospital Waste Management Rules (2005). Following the didactic training, the model …	Participants expressed positive feedback regarding the training experience (Theme: Self-reported usefullness and satisfaction of the program). They shared favorable comments concerning the program's objectives, content, approach, materials, ambiance, and quality of instruction, indicating that they enjoyed the overall delivery and structure of the intervention	Prior to the intervention, no statistically significant difference was found between the intervention and control groups at baseline regarding their knowledge, attitude, and practices (P>0.05) (Theme 1: Initial improvement in essential knowledge gained). Following the intervention, participants showed statistically significant improvements across all measured domains (p<0.001). The mean knowledge…	Noted assessed	Noted assessed
37	Seto, T. L., Tabangin, M. E., Josyula, S., Taylor, K. K., Vasquez, J. C., & Kamath-Rayne, B. D. (2015).	Educational outcomes of Helping Babies Breathe training at a community hospital in Honduras. Perspectives on medical education, 4, 225-232.	Quantitative	To evaluate the acquisition of knowledge and skills following this training and correlation of learner characteristics to performance in a Spanish-speaking setting.	Honduras	Quasi-Experimental (With pre-posttest)	Nurses	39	Physicians (31)		Helping Babies Breathe training program	No	The Helping Babies Breathe (HBB) intervention was a single-day, eight-hour workshop delivered across three sessions to 20–25 participants each day. The training targeted both physicians and nurses who work together on neonatal resuscitation teams. The course was facilitated by Spanish-speaking Master Trainers from the United States, utilizing didactic sessions, demonstrations, and group discussio…	Participants reported high satisfaction and increased self-efficacy following the course. The mean confidence level in neonatal resuscitation improved from 4.01 pre-training to 4.59 post-training, and bag-mask ventilation confidence increased from 4.11 to 4.67 (Theme 1. Improved self-repoted professional satisfaction [confidence]). Trainees highly valued the hands-on practice with the simulator, …	The training successfully improved the knowledge base of both physician and nurse participants. While physicians began with a higher mean pre-test score (15.9± 1.1) compared to nurses (14.2 ± 2.1), both professions showed significant improvement in their post-test scores (Theme 1. Initial improvement in essential knowledge gained across professional) . Physician scores increased to 16.7 ±0.7, and…	The Objective Structured Clinical Examination B (OSCE B) served as a measure of practical skills performance and demonstrated strong behavioral improvements. After training, the mean OSCE B scores rose substantially for both groups: for physicians, scores increased from 9.5± 3.7 to 16.0 ±2.5, and for nurses, they rose from 7.8 ±3.3 to 14.3±2.3 (Theme: Improved professionals' practical uptake). Th…	Noted assessed
38	Thukral, A., Lockyer, J., Bucher, S. L., Berkelhamer, S., Bose, C., Deorari, A., ... & Singhal, N. (2015)	Evaluation of an educational program for essential newborn care in resource-limited settings: Essential Care for Every Baby. BMC pediatrics, 15, 1-11.	Quantitative	To assess the overall design of the course; the ability of facilitators to teach the course; and the knowledge and skills acquired by the learners.	India and Kenya	Quasi-Experimental (With pre-posttest)	Nurses		Clinical officers	12 hours	Essential Care for Every Baby (ECEB) educational program	No	The Essential Care for Every Baby (ECEB) educational program is a 12-classroom-hour intervention delivered via a train-the-trainer cascade model. Master trainers instruct experienced clinician-educators (facilitators) who then teach facility-based healthcare workers responsible for newborn care. The program utilizes interactive learning strategies to increase cognitive knowledge and develop essen…	Both facilitators and learners reported high satisfaction with the ECEB program's delivery and structure. Facilitators praised the program for being well-planned and organized, and reported feeling confident in their ability, time, and information to teach the course effectively (Theme1: Improved self-reported satisfaction (Delivery). Learners mirrored this positive feedback, reporting that the c…	The intervention significantly improved the cognitive knowledge of both groups. Facilitators demonstrated strong post-course knowledge scores, averaging 25.8 (out of 30) in India and 26.7 in Kenya (Theme 1. Initial improvement in essential knowledge gained). More critically, learner knowledge showed marked improvement, increasing from a mean score of 19.4 (pre-course) to 24.8 (post-course) on the…	The ECEB program demonstrated effectiveness in improving practical, observable skills. Facilitators achieved high mean scores on Objective Structured Clinical Examination A (OSCE A) with 17.6 in India and 16.2 in Kenya, suggesting strong proficiency in delivery skills (Theme: Improved professionals' practical uptake , delivery skills). For the target audience, the learners' practical skills also …	Noted assessed
39	Vail, B., Spindler, H., Morgan, M. C., Cohen, S. R., Christmas, A., Sah, P., ... & Walker, D. M. (2017).	Care of the mother-infant dyad: a novel approach to conducting and evaluating neonatal resuscitation simulation training in Bihar, India. BMC pregnancy and childbirth, 17, 1-9.	Quantitatrive	To assess the impact of a novel in-situ simulation training program, developed by PRONTO International and implemented in collaboration with CARE India, on NR skills of nurses in Bihar	India	Quasi-Experimental (With pre-posttest)	Nurses	658	No	8months	Neonatal resuscitation (NR) simulation training	No	The PRONTO International NR simulation training was an 8-month extended mentorship program implemented in Primary Health Centers (PHCs) across Bihar, India, as part of the AMANAT quality improvement project. Indian nurse mentors, working in pairs, facilitated the training for Auxiliary Nurse Midwives (ANMs) and General Nursing Midwives (GNMs) one week per month. The curriculum focused on team bui…	Noted assessed	The PRONTO simulation training successfully demonstrated that nurses maintained high-fidelity Neonatal Resuscitation (NR) skills even when faced with increasing clinical complexity (moving from Level 1, NR only, to Level 3, simultaneous maternal and neonatal complications) (Theme 1. Sustained improvement in essential professional NR skills). The percentage of simulations in which mentees complete…	Noted assessed	Noted assessed
40	Parvin-Nejad, F. P., Padmanaban, V., Jalloh, S., Barrie, U., & Sifri, Z. C. (2022).	Stop the bleed in rural Sierra Leone: one year of interventions and outcomes by nursing trainees.	Quantitative	To examine the frequency and effectiveness of STB interventions in LMICs	Sierra Leone	Quasi-Experimental (With pre-posttest)	Nurses	121	No	1hour	Stop the Bleed (STB) course	No	The intervention was a Stop the Bleed (STB) course, developed by the American College of Surgeons (ACS) , intended to equip the general public with skills to intervene for victims of severe bleeding. The course was provided to female nursing students at the Kabala Nursing School in rural Sierra Leone by STB-certified instructors, including volunteers from a US-based surgical NGO (ISHI) and a loca…	The Stop the Bleed (STB) course was exceptionally well-received by the nursing students. One month post-course, 98% of the 82 respondents agreed they felt confident with the knowledge and skills they learned (Theme 1: Improved self-reported confidence). Furthermore, 98% of these respondents reported they would recommend the STB course to members of their community (Theme 2: Proven program utility…	Noted assessed	The intervention resulted in a significant change in participant behavior and practice. Within one month, 75% of respondents had encountered a bleeding victim, and 97% of those who intervened (Theme: Improved professionals' practical uptake , delivery skills). They successfully controlled bleeding in 98% of those cases (Subtheme: Applied gained skills in clinical setting). At the 12-month follow-…	The training demonstrated a substantial and positive impact on patient outcomes. Out of the 207 analyzed encounters with life-threatening bleeding victims, 197 victims survived, representing a 95% survival rate for all encounters (Theme 1: Decreased patients' mortarity rate), and a 97% survival rate for all victims who received an intervention (Theme 2: Improved effectiveness of healthcare delive…
41	Krishnamurthy Jayanna, K. J., Bradley, J., Prem Mony, P. M., Cunningham, T., Washington, M., Swarnarekha Bhat, S. B., ... & Avery, L. (2016).	Effectiveness of onsite nurse mentoring in improving quality of institutional births in the primary health centres of high priority districts of Karnataka, South India: a cluster randomized trial	Quantitive	To assess the effectiveness of a nurse-led onsite mentoring program in improving quality of care of institutional births in 24/7 primary health centres (PHCs that are open 24 hours a day, 7 days a week) of two high priority districts in Karnataka state, South India.	India	RCT	Nurses	162	No	1year	Onsite Nurse Mentoring Program	Yes (initial training update and the case sheets)	The Onsite Nurse Mentoring Program was a facility-level quality improvement intervention aimed at enhancing the quality of institutional births in 24/7 Primary Health Centres (PHCs). The comprehensive package involved two main components for the intervention facilities. Firstly, all staff nurses across both intervention and control arms received a three-day training update and a new, restructured…	Noted assessed	The Onsite Nurse Mentoring program significantly improved the practical knowledge and skills of providers in the intervention group compared to the control group by the end of the program (Theme 1: Improved practical skills). This improvement was evident across multiple critical care areas. Specifically, the percentage of staff with knowledge of all three steps of Active Management of Third Stage…	The intervention successfully improved both facility readiness to manage complications and provider practice as measured by documentation compliance. In terms of readiness, intervention facilities showed significantly higher odds of possessing the necessary supplies for managing gestational hypertension (OR 9.2), with 19 facilities achieving readiness by endline compared to only 3 in the control …	Noted assessed
42	Weinberg Steven, Jones Denise, Worku Bogale, Kumera Megerssa, Bose Carl, Patterson Jacquelyn. (2019).	Helping Babies Survive Training Programs: Evaluating a Teaching Cascade in Ethiopia.	Quantitative	To quantify the extent of HBS dissemination, characterize the train-the-trainer cascade to highlight barriers that impede successful dissemination, and assess the cost of this training.	Ethiopia	Cross-sectional	Midwives	1146	No	3 days	Helping Babies Survive Training Program	No	The Helping Babies Survive (HBS) training program, developed by the American Academy of Pediatrics, is a set of educational modules commonly implemented in low- and middle-income countries (LMICs) to reduce neonatal mortality by training providers in evidence-based care. The program utilizes a train-the-trainer cascade model for dissemination, which is an economical strategy for scale-up. In 2015…	Participants who attended the regional workshops generally reacted positively, showing an acceptance of the program's expectations and confidence in its content (Theme 1: Improved self-reported confidence). Nearly all regional workshop attendees confirmed their understanding of the expectation to return to their hospitals and teach HBS to others (94%) (Theme 2: Improved self-reported participants…	The intervention significantly improved the knowledge and practical skills of the regional workshop attendees. The mean pre-training score on the HBB Multiple-Choice Question Examination (MCQE) was 76±18%, with a passing rate of 51% (Theme 1: Initial improvement in essential knowledge gained). This improved significantly (p<0.001) to a mean of 89±11% after training, with a passing rate of 84%. Fo…	Noted assessed	Noted assessed
43	Ploutz M, Lu JC, Scheel J, Webb C, Ensing GJ, Aliku T, et al.(2016)	Handheld echocardiographic screening for rheumatic heart disease by non-experts. Heart 2016; 102: 35-9.	Quantitative	To examine nurse performance and interpretation of Handheld echocardiography(HAND) using a simplified approach for rheumatic heart disease (RHD) screening.	Uganda	Cross-sectional	Nurses	2	No	3 days	Handheld echocardiographic training	No	The HAND training program was designed to quickly equip non-specialist nurses in Uganda with the skills necessary to perform a simplified echocardiography protocol for Rheumatic Heart Disease (RHD) screening using the handheld Simplified Transthoracic Echocardiography Protocol for RHD device. The target population was two Ugandan nurses with six months of experience in obtaining limited echocardi…	Noted assessed	Noted assessed	The training successfully resulted in the transfer of skills, demonstrating a high degree of competency in the nurses' ability to perform RHD screening independently (Theme 1: Improved nurses' practical uptake [Independent screening]). When comparing the nurses' diagnoses to the gold-standard full echocardiograms, the findings revealed a sensitivity of 74.4% (58.8% to 86.5%) and a specificity of …	Noted assessed
	Qualitative data											Qualitative
44	Rao, S. R., Salins, N., Goh, C. R., & Bhatnagar, S. (2022).	Building palliative care capacity in cancer treatment centres: a participatory action research.	Qualititave	To develop, implement and evaluate the outcomes of the palliative care capacity-building program	India	Participatory action research	nurses	52	Medical doctors (54)	5-day residential face-to-face training program along with a 5-day clinical attachment at a specialist palliative care institute.	Palliative care capacity-building program (Training)	N/A	The intervention was a multi-cycle Palliative Care Capacity-Building Program for healthcare practitioners in Indian cancer treatment centers, structurally guided by the WHO Public Health Model focusing on education, drug availability, and implementation. Its development in the first cycle was informed by a needs assessment, including a rapid literature review and a Focus Group Discussion with nat…	Not reported	Not reported	Not reported	The palliative care capacity-building program achieved substantial organizational and system-level improvements (Theme: Improved organizational capacity and system-level performance). The number of independent palliative care outpatient departments in cancer treatment institutes increased from 12 to 23, with a corresponding rise in healthcare providers working in palliative care from 36 to 174 (S…
11	Bull, E. R., Mason, C., Junior, F. D., Santos, L. V., Scott, A., Ademokun, D., ... & Cavanagh, S. M. (2017).	Developing nurse medication safety training in a health partnership in Mozambique using behavioural science. Mixed Method / Quali part.	Mixed: Qualitative	To explore the initial impact of an international health partnership’s work to develop a drug calculation workshop for nurses in Beira, Mozambique	Mozambique	Descriptive	nurses	123	No	2-weekly lectures lasting 3 hours each with a face-to-face discussion.	Medication safety training	N/A	The intervention was a two-phase medication safety training program for primary care nurses, delivered primarily by a local pharmacist. Phase One focused on adapting an existing PowerPoint presentation based on a needs assessment (including audit and discussions). This content covered various drug calculations (doses, infusions, dilutions, conversions) and was translated into Portuguese. Health p…	All 49 comments received immediately after training indicated positive reception (Theme. Participants satisfaction--S/T. Positive emotional response). Participants described the drug calculation game as really good and fantastic because it opened the mind more and promoted long-term retention (Theme. perceived program relavance and utile). Several participants also expressed intentions for future…	Participants reported that the CPD workshop enhanced their capability to calculate drug doses (Theme. Improved practical skills--S/T. Enhanced calculation proficiency) and increased their motivation to ensure calculation accuracy to prevent negative consequences (Theme. Attitude professional changed--Subheme. improved motivation and responsibility for accuracy).	Nearly all participants reported that the training had already positively impacted their medication safety practices within the week following training. This included calculating drug doses with more precision, consistently using a calculator (e.g: confirm calculations by converting crystalised penicillin to millilitres) (Theme. New skills applied (enhaced medication safety practice))., and infor…	Noted assessed
13	Shah S, Santos N, Kisa R, Mike Maxwell O, Mulowooza J, Walker D, et al. (2020)	Efficacy of an ultrasound training program for nurse midwives to assess high-risk conditions at labor triage in rural Uganda. Mixed Method / Quali part.	Mixed: Qualitative	To evaluate the 2-week training curriculum and trainees’ ability to perform a standard scanning protocol and interpret ultrasound images	Uganda	Descriptive	Nurse midwives	12	No	2 weeks	Ultrasound training program	N/A	The point-of-care ultrasound training program for nurse midwives in rural Uganda was rolled out in two phases: Phase 1 involved 11 clinicians from a District Hospital (DH) who underwent a two-week training with daily hour-long lectures and hands-on scanning practice, sometimes while performing clinical duties. Phase 2 involved 14 clinicians from three Health Centers (HCs) and was modified based o…	Participants indicated high satisfaction with the core content and the facilitators' approach, as they valued the written materials, the hands-on practice being a key part of the curriculum (Theme. Participants satisfaction), the relevance of the subject (Theme. Usefulness of the program), and the friendly trainers' interactions. However, participants were not satisfied with the program logistics…	The intervention also had a positive impact on the Master Trainers' educator competence, improving their knowledge and practical skills as a trainer (Theme. improved knowledge and skills---S/T. Enhanced educator competence and pedagogical Skills) , as well as positively influencing their self-esteem regarding their new role in training others (Theme. improved self-efficacy)	Noted assessed	Noted assessed
14	Raney, J. H., Morgan, M. C., Christmas, A., Sterling, M., Spindler, H., Ghosh, R., ... & Walker, D. M. (2019)	Simulation-enhanced nurse mentoring to improve preeclampsia and eclampsia care: Mixed Method / Quali part.	Mixed: Qualitative	To assess the impact of simulationbased training on PE/E diagnosis and management in Bihar by evaluating changes in nurse mentees’ use of EBPs in simulated PE/E cases and exploring perceived barriers and enablers of high quality PE/E care among nurse mentors.	India	Descriptive	Nurse midiwives	3422	No	8months	Simulation-based training	N/A	The intervention was a statewide, high-fidelity simulation-enhanced nurse mentoring program developed by PRONTO International and implemented in collaboration with CARE India, embedded within the larger AMANAT nurse mentoring program in Bihar, India. This mixed-methods study aimed to improve the use of evidence-based practices (EBPs) for preeclampsia and eclampsia (PE/E) diagnosis and management …	Based on interviews with nurse mentors, the program achieved a positive perception and fostered critical changes in the clinical environment. Mentors universally agreed that the simulation training and concurrent mentoring during live cases were important enablers of high-quality care (Theme. Perceived utility of the program), reporting that this exposure was crucial for developing their mentees'…	Noted assessed	Noted assessed	Noted assessed
19	Do Thi, N., Thi, G. H., Lee, Y., Minh, K. P., Thanh, H. N., Shin, J. S., & Luong Xuan, T. (2024).	First-aid training for primary Healthcare providers on a remote Island: a mixed-methods study. BMC Medical Education, 24(1), 790.	Mided: Qualitative	To evaluate the effectiveness of a first-aid training program for PHPs on a Vietnamese island and explored their perspectives and experiences regarding first-aid implementation.	Viet Nam	Descriptive	Nurses (14) & Midwives (9)	23	Physicians (16)	2 days	First Aid training program	No	The first-aid training program was delivered face-to-face over two days. The curriculum covered both theoretical and practical training across five dimensions: basic life support (BLS), drowning, bleeding, fractures, and burns. The theoretical aspects were taught using didactic lectures, videos, and case studies. For the practical sessions, the 39 participants were divided into seven groups (six …	The participants reacted positively to the first-aid training, demonstrating both satisfaction (Theme. participants satisfaction) and a strong desire for continued education. All PHPs expressed increased confidence in handling emergencies after the training (Theme. Perceived utility of the program), with some stating they felt ready to teach their colleagues (Theme. Commitment to sustained engage…	While quantitative data showed knowledge improvement, the qualitative findings primarily highlight changes in attitude and readiness to apply skills. After completing the training and the immediate scenario-based assessments, participants reported a significant boost in their confidence and felt ready and capable to apply the first-aid techniques in real-life emergencies (Theme. improved self-eff…	Participants' belief that the training enhanced their capability to manage emergencies more efficiently and provides a critical buffer time for patient survival is a finding about their intention (Theme. Applied new skills--S/T. Belief in enhanced efficacy to improve patient outcomes) and perception of how the learning will be applied to their professional behavior.	Noted assessed
16	Gyamfi, J., Plange-Rhule, J., Iwelunmor, J., Lee, D., Blackstone, S. R., Mitchell, A., ... & Ogedegbe, G. (2017).	Training nurses in task-shifting strategies for the management and control of hypertension in Ghana: a mixed-methods study. Mixed Method / Quali part.	Mixed: Qualitative	To assess nurses’ knowledge and practice of hypertension management and control pre- and post-training utilizing task-shifting strategies for hypertension control in Ghana (TASSH).	Ghana	descriptive	Nurses	64	No	12days	Training program on task-shifting strategy for hypertension	No	The Task-Shifting Strategy for Hypertension Control in Ghana (TASSH) training was a centralized, in-person program delivered by clinical hypertension specialists and experienced study staff starting in August 2012 and recurring every six months for an average of four sessions. The program targeted Community Health Nurses (CHNs) and Enrolled Nurses (ENs) to train them in essential hypertension man…	Nurses universally reported positive outcomes with respect to the TASSH training. They expressed satisfaction that the intervention resulted in the improvement of interpersonal skills and patient education (Theme. Participants satisfaction). The training was perceived as valuable because it increased their capacity to manage hypertension, address the root causes of the condition, and provide bett…	Nurses reported a significant improvement in their professional knowledge and clinical skills. They noted that their general hypertension management ability was better and that their knowledge of interpreting measurements and patient labs improved (Theme. Improved knowledge and skills--S/T. Enhanced disease management and interpretation skills). Specifically, they gained proficiency in interpreti…	The nurses reported applying the new knowledge and skills, resulting in changed behaviors. They described being able to counsel patients on control and treatment of hypertension by discussing diet, lifestyle changes, and medication (Theme. Change in clinical practice or Integrate comprehensive patient education --S/T. Use skillful counseling on lifestyle and treatment adherence). They also integr…	Noted assessed
45	Ayub, F., Afzal, N., Ali, W., Asif, F., ul Hassan, S. S., Haque, G., ... & Latif, A. (2024).	Exploring medical and nursing students’ perceptions about a patient safety course: a qualitative study.	Qualititave	To explore student perceptions about a patient safety course to assess its influence on aspiring health professionals at a personal level as well as to explore differences in areas of focus between medical and nursing students.	Pakistan	descriptive	Nurses students	393	Medical students (184)	4.5 days	Patient safety course	No	The patient safety course was an intensive 4.5-day program on Quality and Patient Safety, delivered to both MBBS (medical) and BScN (nursing) students. Modeled after a Johns Hopkins University course, it was adapted with locally relevant examples to fit the local context. The curriculum was delivered using diverse teaching methods, including lectures, group activities, interactive case study disc…	Participants provided overwhelmingly positive feedback on the training methodology, specifically endorsing the use of real-life examples and case studies. They felt this teaching strategy was highly effective, as it invoked critical thinking, analytical skills, and the application of relevant knowledge (Theme: Participants satisfaction with methodology). The course content significantly improved …	The course successfully fostered a significant change in participants' knowledge and perceptions about medical errors. Most participants reported hearing about the incidence and consequences of such errors for the first time during the course (Theme: Initial improvement in essential knowledge gained). Critically, the training changed their view of error causation, as they realized that medical er…	Noted assessed	Noted assessed
46	Bassah, N., Cox, K., & Seymour, J. (2016).	Bassah, et al. (2016). A qualitative evaluation of the impact of a palliative care course on preregistration nursing students’ practice in Cameroon.	Qualititave	To contribute to the palliative care evidence base by examining how nursing students in receipt of education report transfer of learning to practice, and what the barriers and facilitators may be, in a resource-poor country.	Cameroon	descriptive	Nurses		No	5 days	Palliative care course	No	The palliative care course was a 30-hour, classroom-based program for pre-registration nursing students at a university in Cameroon. Underpinned by the experiential learning theory, the curriculum was meticulously developed through a modified systematic review of the literature, consultation with international palliative care experts, and input from local Cameroonian palliative care nurses and nu…	The course was effective in stimulating self-reflection and empathy, as students reported using their learning to make sense of their practice with patients at the end of life (Theme: Usefulness of the program [Self-Reflection & Empathy]). They were able to think critically about the kind of care they would wish to receive, which improved their competencies in palliative care practice. This refle…	Noted assessed	The course successfully fostered a transfer of learning to practice, leading to observable changes in the students' on-the-job behavior and attitudes. Students reported an improved professional attitude characterized by increased compassion and empathy toward patients, especially those who appeared to lack family support or were receiving substandard care from the ward team (Theme: Change in pati…	Noted assessed
33	Downing, J., Batuli, M., Kivumbi, G., Kabahweza, J., Grant, L., Murray, S. A., ... & Leng, M. (2016).	A palliative care link nurse programme in Mulago Hospital, Uganda: an evaluation using mixed methods. BMC palliative care, 15, 1-13.	Mixed: Qualitavite	To evaluate the impact of the palliative care link nurse programme at Mulago Hospital	Uganda	descriptive	Nurses	27	No	5days	Link-nurse programme	No	The intervention is the Palliative Care Link Nurse Programme, a model implemented by the Makerere/Mulago Palliative Care Unit (MPCU) in Mulago Hospital, Uganda, to integrate palliative care (PC) into general hospital services. This program established a generalist-specialist PC model by selecting 27 practicing nurses from key wards to serve as Link Nurses. The core of the program was an adapted 5…	The nurses provided highly positive feedback on the training itself, noting that all topics were considered "very useful" and that revision of familiar topics was "helpful" (Theme: Nurses satisfaction [Pedagogical appeal], Subtheme: Perceived value of topics). They specifically appreciated the "interactive nature" of the course and the inclusion of case discussions and scenarios. Furthermore, par…	Qualitative data confirmed a significant and positive shift in the Link Nurses' attitudes, skills, and knowledge. The nurses reported that the program fundamentally changed their attitude toward palliative care and their patients, leading them to view palliative care patients as integral to their daily work (Theme: Changed professional attitude). Crucially, they adopted the perspective that 'ther…	The intervention prompted significant behavioral changes, primarily in how the Link Nurses interacted with patients, colleagues, and the specialist unit. The training successfully fostered stronger relationships and "that bond" between the Link Nurses and their patients, increasing patient confidence (Theme: Change in clinical behavior ---Subtheme: Relationship: Centered care and Trust building).…	At the organizational level, the intervention was qualitatively associated with a positive systemic outcome: it improved and strengthened palliative care access throughout the hospital (Theme: Enhanced access to specialized services). This was evidenced by the increased numbers of patients referred to the specialist MPCU over the two-year period. This positive impact is directly attributable to t…
